# Supplementary material for: Associations between low serum levels of ANRIL and some common gene SNPs in Iranian patients with premature coronary artery disease
Source: PubMed Central journal article supplement (PMC10787829; doi:10.1038/s41598-024-51715-2), 2024-01-13
Supplement: 41598_2024_51715_MOESM1_ESM.pdf [file 41598_2024_51715_MOESM1_ESM.pdf]

***Associations between low serum levels of ANRIL and some common gene SNPs in patients with premature CAD***

Elham Taheri Bajgan<sup>1</sup>, Ali Zahedmehr<sup>2</sup>, Farshad Shakerian<sup>2,3</sup>, Majid Maleki<sup>3</sup>, Hooman Bakhshandeh<sup>3</sup>, Seyed Javad Mowla<sup>1\*</sup>, Mahshid Malakootian<sup>3\*</sup>

- 1- Molecular Genetics Department, Faculty of Biological Sciences, Tarbiat Modares University, Tehran, Iran
- 2- Cardiovascular Intervention Research Center, Rajaie Cardiovascular Medical and Research Center, Iran University of Medical Sciences, Tehran, Iran
- 3- Cardiogenetics Research Center, Rajaie Cardiovascular Medical and Research Center, Iran University of Medical Sciences, Tehran, Iran

\* Corresponding Authors:

malakootian@rhc.ac.ir (MM)

sjmowla@yahoo.com (SJM)

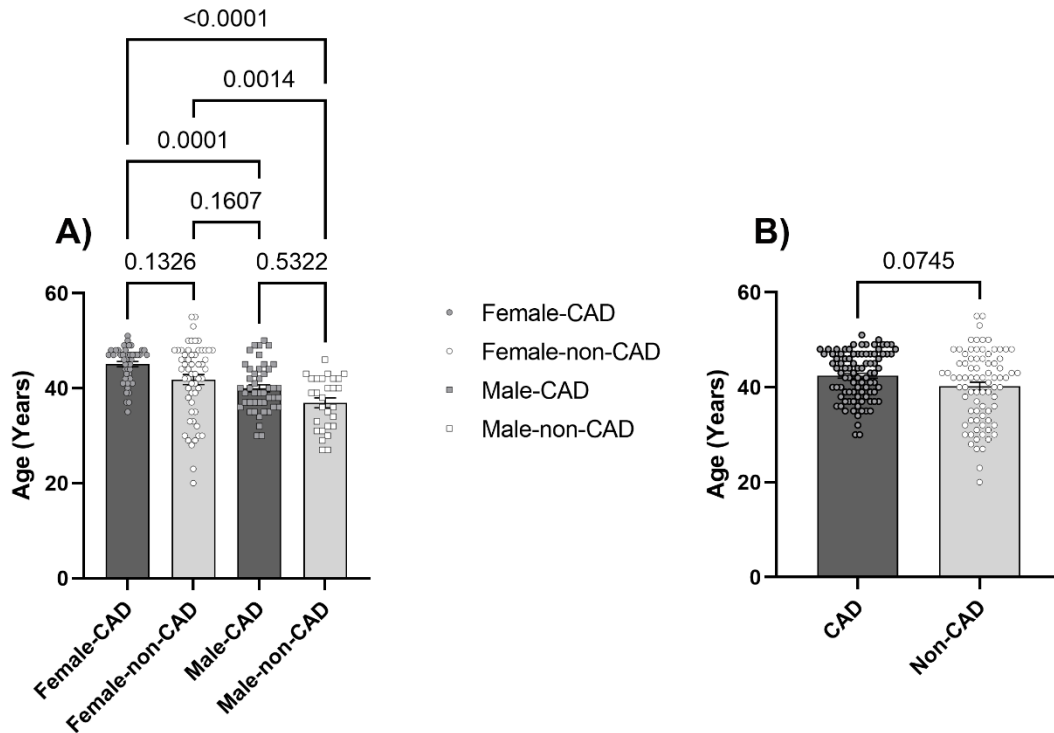

**S1 Figure.** The age distribution graphs respective (A) and irrespective (B) to sex. A) non-parametric one-way ANOVA was performed to compare the difference between the four groups.  $P$ -values are demonstrated above each comparison.  $P$ -values are retrieved from multiple comparison analysis in GraphPad prism. B) t-test was used to compare the difference between age in CAD and non-CAD groups irrespective to sex.  $P$ -value is indicated above the comparison line.

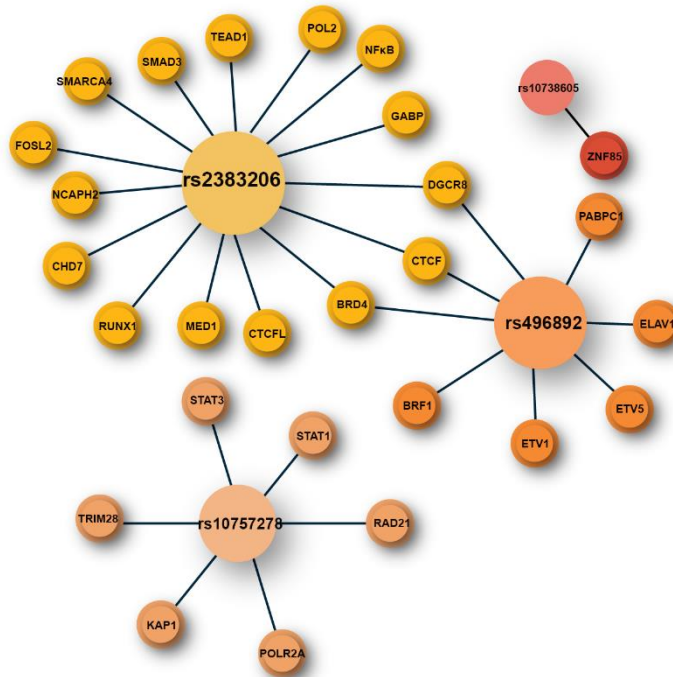

**S2 Figure.** The *in silico* analysis. The network of SNPs and the transcription factors that their binding sites include the studied SNPs. The list of transcription factors is as follows: rs2383206 for DGCR8, CTCF, GABP, NF $\kappa$ B, Pol2, CTCFL, MED1, RUNX1, BRD4, CHD7, NCAPH2, FOSL2, and TEAD1; rs496892 for DGCR8, CTCF, PABPC1, ELAV1, ETV5, ETV1, BRD4, and BRF1; rs10757278 for STAT1, STAT3, POLR2A, RAD21, KAP1, and TRIM28; and rs10738605 for ZNF85.

**S1 Table.** The sequence and features of primers.

| Number | Name       | Gene / Transcript  | Exon / Intron number | Forward (F)/ Reverse (R) | Sequence                  | Product Length (bp) |
|--------|------------|--------------------|----------------------|--------------------------|---------------------------|---------------------|
| 1      | rs10757274 | CDKN2B-AS1 (ANRIL) | Intron 12            | F                        | GTGATGGGAGGTACTGGTATTAC   | 378                 |
|        |            |                    |                      | R                        | GAACAATGCCAAGTTCATAGTCAGG |                     |
| 2      | rs2383206  | CDKN2B-AS1         | Intron 16            | F                        | CAGAGGCAGCGGCTAAGACCAT    | 438                 |
|        |            |                    |                      | R                        | GGAGTCCAAACATTGGTACATAC   |                     |
| 3      | rs2383207  | CDKN2B-AS1         | Intron 16            | F                        | TGGACTTGGGGATTATTGGTGG    | 479                 |
|        |            |                    |                      | R                        | CAGACTACCTTGTGTCTCATCACAC |                     |
| 4      | rs496892   | CDKN2B-AS1         | Intron 1             | F                        | CCCACAAAAATGCCTTGCCTTCAC  | 689                 |
|        |            |                    |                      | R                        | GTCCGTATCAAAAGCAAACCTAC   |                     |
| 5      | rs10757278 | CDKN2B-AS1         | Intergenic region    | F                        | CACAATCCCACATTTTAAGGGC    | 473                 |
|        |            |                    |                      | R                        | GCTAGACTCCACGCTGTTC       |                     |
| 6      | rs10738605 | CDKN2B-AS1         | Exon 6               | F                        | TGACTAGGCTAATACTACTATGTGG | 309                 |
|        |            |                    |                      | R                        | GCTTGTGTTTGGACAGAGTAGG    |                     |
| 7      | E1         | NR_003529          | Exon 1               | F                        | TACATCCGTCACCTGACACG      | 185                 |
|        |            |                    |                      | R                        | TGAGATGACCTCGCTTTCCT      |                     |
| 8      | E5-6       | NR_003529          | Exon 5-6             | F                        | GCCTCATTCTGATTCAACAGCAG   | 159                 |
|        |            |                    |                      | R                        | GATTCCAGCACACCTAACAGTG    |                     |
| 9      | E19        | NR_003529          | Exon 19              | F                        | TGCTTACCTAGTGCCAGATGC     | 150                 |
|        |            |                    |                      | R                        | ATTACCAGCGGTGCAACTTC      |                     |
| 10     | 5s rRNA    | NR_023363          | Exon 1               | F                        | GTCTACGGCCATACCACCCTG     | 121                 |
|        |            |                    |                      | R                        | AAAGCCTACAGCACCCGGTAT     |                     |

All exon and intron numbers correspond to the sequence of exons and introns in transcript variant. 1 of each gene.

**S2 Table.** The linkage disequilibrium analysis.

| D'<br>r <sup>2</sup><br>LOD | rs2383206             | rs2383207             | rs496892             | rs10757278            | rs10738605            |
|-----------------------------|-----------------------|-----------------------|----------------------|-----------------------|-----------------------|
| rs10757274                  | 0.95<br>0.75<br>45.31 | 0.96<br>0.73<br>43.76 | 0.37<br>0.08<br>3.5  | 0.98<br>0.80<br>52.21 | 0.40<br>0.11<br>4.49  |
| rs2383206                   |                       | 1.00<br>0.95<br>63.52 | 0.37<br>0.11<br>4.47 | 1.00<br>0.67<br>41.8  | 0.40<br>0.14<br>5.62  |
| rs2383207                   |                       |                       | 0.33<br>0.09<br>3.74 | 1.00<br>0.63<br>38.8  | 0.36<br>0.12<br>4.83  |
| rs496892                    |                       |                       |                      | 0.33<br>0.06<br>2.45  | 0.98<br>0.85<br>49.71 |
| rs10757278                  |                       |                       |                      |                       | 0.37<br>0.08<br>3.3   |

The values of D', r2, and LOD are listed for each pair of SNPs from Haploview.

**S3 Table.** Variant table.

| Variant ID      | Genomic position     | In silico prediction |                 | ACMG classification |
|-----------------|----------------------|----------------------|-----------------|---------------------|
|                 |                      | CADD (PHRED)         | DANN (Score)    |                     |
| rs10757274: A>G | hg.38 chr9- 22096056 | 4.845                | Benign (0.7604) | Benign              |
| rs2383206: A>G  | hg.38 chr9-22115027  | 0.029                | -               | Benign              |
| rs2383207: A>G  | hg.38 chr9-22115960  | 0.034                | -               | Benign              |
| rs496892: C>T   | hg.38 chr9-22024352  | 1.407                | -               | Benign              |
| rs10757278: A>G | hg.38 chr9-22124478  | 11.93                | -               | Benign              |
| rs10738605: C>G | hg.38 chr9-22049131  | 4.736                | -               | Benign              |

Characteristics of the included genetic variants. The variant ID from dbSNP153, the genomic position, and in silico prediction by CADD and DANN tools are listed in the table. The last column contains the ACMG classification for each SNP.
